# Supplementary material for: Quantitative trait loci associated with longevity of lettuce seeds under conventional and controlled deterioration storage conditions
Source: PubMed Central journal article supplement — J Exp Bot. 2010 Aug 6;61(15):4423–36. doi: 10.1093/jxb/erq248 (PMC2955753; doi:10.1093/jxb/erq248), 2010-08-06
Supplement: supp_erq248_00048231-file001.pdf [file supp_erq248_00048231-file001.pdf]

Schwember, A.R. and Bradford, K.J. (2010) Quantitative trait loci associated with longevity of lettuce seeds under conventional and controlled deterioration storage conditions. *Journal of Experimental Botany*.

**Supplemental Table S1.** Candidate genes mapped near two longevity-associated QTLs on chromosome 4 in a *Lactuca sativa* cv Salinas x *L. serriola* UC96US23 RIL population. EST marker identifications are from the Compositae Genome Project database ([http://compgenomics.ucdavis.edu/compositae\\_index.php](http://compgenomics.ucdavis.edu/compositae_index.php)). Named candidate genes refer to homologues in Arabidopsis.

a) *Slg4.1*

| EST Identification   | Gene           | Description                                                | Position (cM) |
|----------------------|----------------|------------------------------------------------------------|---------------|
| CLS_S3_Contig10071   | <i>AtHSF4</i>  | Heat shock transcription factor 4                          | 23.9          |
| CLSS2458.b1_D15.ab1  |                | Phosphoglycerate/bisphosphoglycerate mutase family protein | 24.0          |
| CLSX3763-1           |                | Disease resistance protein (CC-NBS-LRR class)              | 24.3          |
| CLS_S3_Contig9524    | <i>AtIRX14</i> | Glycosyltransferase family 43                              | 26.2          |
| CLS_S3_Contig1303    |                | Protein kinase family                                      | 28.2          |
| CLS_S3_Contig5097-1  | <i>AtMAT3</i>  | Methionine adenosyltransferase 3                           | 32.5          |
| QGC1c12.yg.ab1       |                | Expressed protein (unknown function)                       | 33.2          |
| CLSS12954.b1_C24.ab1 |                | Octicosapeptide/Phox/Bem1p (PB1) domain-containing protein | 34.6          |
| CLS_S3_Contig2638    |                | Eukaryotic initiation factor 5 (eIF-5) - related           | 36.4          |
| CLSX586-2            |                | Disease resistance protein (TIR-NBS-LRR class)             | 39.8          |
| CLSY6760.b1_O10.ab1  |                | No homologs found                                          | 41.5          |
| CLS_S3_Contig3327    |                | Expressed protein (unknown function)                       | 41.9          |
| CLSX3212.b1_H11.ab1  | <i>AtUBC16</i> | Ubiquitin-conjugating enzyme 16                            | 42.0          |
| CLSX8292.b1_G10.ab1  |                | pfkB type carbohydrate kinase protein family               | 42.5          |

b) *Slg4.2*

| EST Identification   | Gene          | Description                                                       | Position (cM) |
|----------------------|---------------|-------------------------------------------------------------------|---------------|
| CLS_S3_Contig7460    |               | AMP-dependent synthetase and ligase family                        | 98.2          |
| CLSY7511.b1_M06.ab1  | <i>AtPAP2</i> | Phytochrome-associated protein 2, AUX/IAA family                  | 99.8          |
| CLS_S3_Contig10550   |               | Zinc finger (GATA type) family protein                            | 102.3         |
| QGD6M21.yg.ab1       |               | ABC transporter family protein                                    | 105.5         |
| CLSM10124.b1_H11.ab1 |               | Expressed protein (unknown function)                              | 108.3         |
| Contig7346-1         |               | DNA replication factor complex-related                            | 108.4         |
| CLS_S3_Contig5035    |               | Phosphoribosylaminoimidazolecarboxamide formyltransferase-related | 108.9         |
| CLS_S3_Contig1412    |               | Expressed protein (unknown function)                              | 109.0         |
| CLSY4564.b1_H14.ab1  |               | Hypothetical protein                                              | 109.7         |
| QGD7P09.yg.ab1       |               | Lipoxygenase (LOX), putative                                      | 114.4         |
| CLR4689.b1_A21.ab1   |               | Hypothetical protein                                              | 118.0         |

**Supplemental Table S2.** Candidate genes mapped near two longevity-associated QTLs on chromosome 1 in a *Lactuca sativa* cv Salinas x *L. serriola* UC96US23 RIL population. EST identifications are from the Compositae Genome Project database ([http://compgenomics.ucdavis.edu/compositae\\_index.php](http://compgenomics.ucdavis.edu/compositae_index.php)). Named candidate genes refer to homologues in Arabidopsis.

*SlgPCD1.2* (75-88 cM) and *SlgCD1.2* (84-116 cM)

| EST Identification   | Gene            | Description                                                                                      | Position (cM) |
|----------------------|-----------------|--------------------------------------------------------------------------------------------------|---------------|
| LSS_S3_Contig5884    | <i>AtCPN60A</i> | RuBisCO subunit binding-protein alpha subunit/60 kDa chaperonin alpha subunit                    | 74.7          |
| LSS_S3_Contig10041   | <i>AtCKS1</i>   | Cyclin-dependent kinase-subunit 1                                                                | 75.6          |
| CLSS8049.b1_B22.ab1  | <i>AtMTN2</i>   | Methylthioadenosine nucleosidase                                                                 | 76.1          |
| CLS_S3_Contig926     |                 | Expressed protein (unknown function)                                                             | 76.7          |
| CLVX8701.b1_I16.ab1  |                 | No homologs found                                                                                | 77.2          |
| CLS_S3_Contig8241    |                 | Glycosyl hydrolase family 17 protein                                                             | 78.0          |
| CLS_S3_Contig165     |                 | Phosphatidic acid phosphatase (PAP2) family protein                                              | 78.2          |
| CLS_S3_Contig2475    | <i>AtABA2</i>   | ABA2 (Abscisic acid deficient 2); alcohol dehydrogenase/ oxidoreductase/ xanthoxin dehydrogenase | 78.8          |
| CLS_S3_Contig4179    |                 | Expressed protein (unknown function)                                                             | 80.8          |
| CLSY1170.b1_C05.ab1  |                 | Expressed protein (unknown function)                                                             | 81.2          |
| CLS_S3_Contig11259   | <i>AtCYSA</i>   | Cysteine-type endopeptidase inhibitor                                                            | 82.1          |
| CLS_S3_Contig8809    |                 | Expressed protein (unknown function)                                                             | 83.1          |
| QGD10G01.yg.ab1      | <i>AtEIN2</i>   | Ethylene-insensitive 2; transporter (EIN2) mRNA                                                  | 84.4          |
| CLSS4149.b1_J06.ab1  |                 | Hypothetical protein                                                                             | 84.9          |
| CLS_S3_Contig7478    |                 | Disease resistance protein-related / LRR protein-related                                         | 85.3          |
| CLS_S3_Contig4595    |                 | Expressed protein (unknown function)                                                             | 86.0          |
| CLR_S1_Contig138     |                 | Hydroxyproline-rich glycoprotein family protein                                                  | 86.5          |
| CLS_S3_Contig6970    |                 | Polyprotein of LTR transposon -related                                                           | 87.4          |
| CLS_S3_Contig4405    | <i>AtBGL2</i>   | Cellulase/glucan 1,3-beta-glucosidase/ hydrolase, hydrolyzing O-glycosyl compounds (BGL2)        | 87.5          |
| QGC9D21.yg.ab1       |                 | Expressed protein (unknown function)                                                             | 88.7          |
| CLS_S3_Contig1555    |                 | Galactosyltransferase family                                                                     | 89.7          |
| CLSS11446.b1_L06.ab1 |                 | No homologs found                                                                                | 89.8          |
| CLSM2828.b1_H11.ab1  |                 | Hypothetical protein                                                                             | 90.0          |
| CLS_S3_Contig1840    |                 | Expressed protein (unknown function)                                                             | 90.5          |

|                      |               |                                                                                         |       |
|----------------------|---------------|-----------------------------------------------------------------------------------------|-------|
| CLVX2506.b1_C04.ab1  |               | Expressed protein (unknown function)                                                    | 91.4  |
| CLS_S3_Contig6529    |               | Expressed protein (unknown function)                                                    | 92.9  |
| CLR_S1_Contig4002    |               | Expressed protein (unknown function)                                                    | 93.6  |
| CLSM19359.b1_N15.ab1 |               | Expressed protein (unknown function)                                                    | 94.6  |
| CLSM6591.b1_M15.ab1  |               | Hypothetical protein                                                                    | 95.9  |
| CLSM17699.b1_E09.ab1 | <i>RPT1A</i>  | 26S proteasome AAA-ATPase subunit RPT1a                                                 | 97.6  |
| QGC20G02.yg.ab1      |               | Leucine-rich repeat protein family                                                      | 97.8  |
| CLS_S3_Contig2081    |               | Glycoside hydrolase family 28 protein / polygalacturonase (pectinase) family protein    | 98.3  |
| QGG26D14.yg.ab1      |               | Pentatricopeptide (PPR) repeat-containing protein                                       | 99.7  |
| QGG9J14.yg.ab1       |               | Hypothetical protein                                                                    | 100.3 |
| CLS_S3_Contig9730    |               | Aspartyl aminopeptidase                                                                 | 100.9 |
| CLSS11512.b1_P22.ab1 |               | Copine-related protein                                                                  | 101.9 |
| QGC17L08.yg.ab1      |               | Cytosolic factor -related                                                               | 102.6 |
| QGC16I05.yg.ab1      |               | Disease resistance protein family                                                       | 103.0 |
| CLSS11111.b1_N18.ab1 | <i>AtHSD5</i> | Hydroxysteroid dehydrogenase 5; binding / catalytic/ oxidoreductase                     | 103.3 |
| CLRY2543.b1_M12.ab1  |               | Ubiquitin-associated (UBA) / Octicosapeptide/Phox/Bemp1 (PB1) domain-containing protein | 104.0 |
| CLS_S3_Contig3192    |               | Expressed protein (unknown function)                                                    | 108.1 |
| CLS_S3_Contig6689    |               | Cytochrome P450, putative                                                               | 108.5 |
| CLS_S3_Contig6990    |               | ATP binding, protein kinase activity, protein serine/threonine kinase activity          | 111.6 |
| CLLY699.b1_F08.ab1   |               | Expressed protein (unknown function)                                                    | 112.1 |
| CLSY4364.b1_H11.ab1  |               | Dehydration-induced protein-related                                                     | 114.9 |
| CLS_S3_Contig6064    |               | Cytochrome p450, putative                                                               | 116.0 |
